# Supplementary material for: Multidrug Resistance Behaviors of Clinical Pseudomonas aeruginosa Strains Associated to Pigment Coloration
Source: Preprints.org preprint supplement (doi:10.20944/preprints202106.0192.v1), 2021-06-07
Supplement: Supplementary file 1 [file supplementary]

Archive with 1 entries (1 files):
- Supplementary Figures.pdf
